# Supplementary material for: Suppression of hypoxia-induced excessive angiogenesis by metformin via elevating tumor blood perfusion
Source: PubMed Central journal article supplement (PMC5650310; doi:10.18632/oncotarget.18029), 2017-05-19
Supplement: oncotarget-08-73892-s001.pdf [file oncotarget-08-73892-s001.pdf]

## Suppression of hypoxia-induced excessive angiogenesis by metformin via elevating tumor blood perfusion

### SUPPLEMENTARY MATERIALS

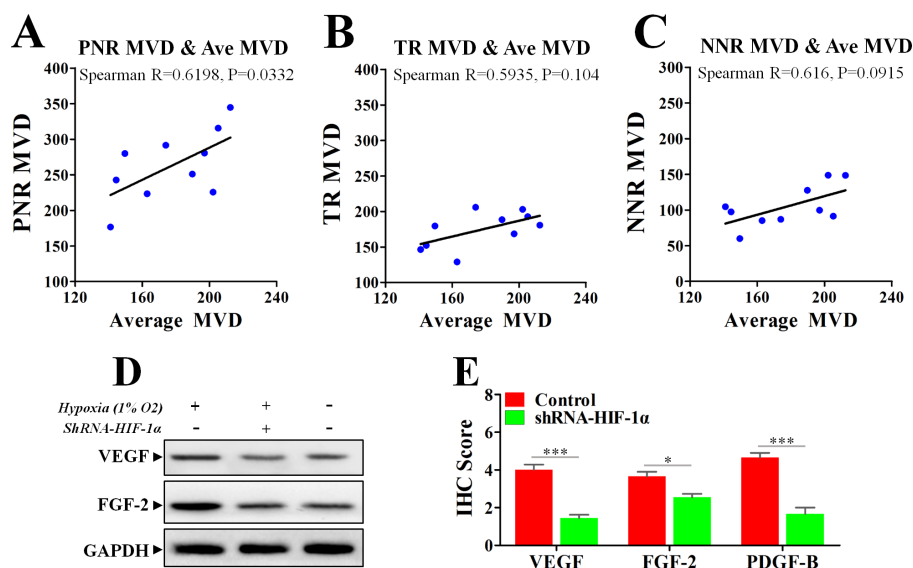

**Supplementary Figure 1: PNR but not NNR or TR MVD was linearly correlated with the Ave MVD, and knockdown of HIF-1 $\alpha$  restrained hypoxia-induced expression of angiogenesis-associated factors.** Spearman analysis for evaluation of the linear correlation between Ave MVD and (A) PNR, (B) TR or (C) NNR MVD. Spearman R indicates the degree of correlation. Ave: average; MVD: microvessel density; NNR: non-necrotic region; PNR: peri-necrotic region; TR: transitional region. A two-sided  $P < 0.05$  was considered statistically significant. (D) Immunoblotting for VEGF, FGF-2 and PDGF-B, showing reduced protein level of angiogenesis-associated factors in Lentivirus-shRNA-HIF-1 $\alpha$  4T1 cancer cells cultured in hypoxic condition (1% O<sub>2</sub>) *in vitro*. (E) Quantification of VEGF, FGF-2 and PDGF-B IHC score (addition of intensity score and positive signal area) in 4T1 tumors transfected with Lentivirus-shRNA-HIF-1 $\alpha$  or Lentivirus-shRNA-Con.  $n = 9$ . Quantitative data are indicated as mean  $\pm$  SEM. \* $p < 0.05$ ; \*\* $p < 0.01$ ; \*\*\* $p < 0.001$ .

**Supplementary Table 1: Primers and antibodies**

| <b>Primers</b> |                          |                         |
|----------------|--------------------------|-------------------------|
| <b>Gene</b>    | <b>Forward Primer</b>    | <b>Reverse Primer</b>   |
| Act- $\beta$   | GACATCCGTAAAGACCTCTATGCC | TCCACACAGAGTACTTGCGCTCA |
| Ang-1          | CAAATGCGCTCTCATGCTA      | GTAGTGCCACTTTATCCCAT    |
| Ang-2          | CGCTGTATGATCACTTCTACCTC  | TCCTGAGAGCATCTGGGAAC    |
| FGF-2          | GGCTGCTGGCTTCTAAGTGT     | TCTGTCCAGGTCCCGTTTTG    |
| HIF-1 $\alpha$ | AGTGGTATTATTTCAGCACGAC   | AAGGCAGCTTGTATCCTCT     |
| PDGF-B         | TCTCTGCTGCTACCTGCGTCT    | CAGCCCCATCTTCATCTACGG   |
| PIGF           | GTCTCACATATTCAGTCCGTCC   | TTGGCTGTCTTTATCGGCAC    |
| VEGF           | GTGCAGGCTGCTGTAACGAT     | GGGATTTCTTGCGCTTTCGT    |

| <b>Antibodies for IHC</b> |                         |                      |
|---------------------------|-------------------------|----------------------|
| <b>Antibody</b>           | <b>Company, Species</b> | <b>Concentration</b> |
| Anti-CD31                 | Abcam, Rabbit           | 1 $\mu$ g/ml         |
| Anti-HIF-1 $\alpha$       | Abcam, Rabbit           | 1.5 $\mu$ g/ml       |
| Anti-PIGF                 | ProteinTech, Rabbit     | 1.5 $\mu$ g/ml       |
| Anti-PDGF-B               | Boster, Rabbit          | 1.5 $\mu$ g/ml       |
| Anti-Ang-1                | Boster, Rabbit          | 1.5 $\mu$ g/ml       |
| Anti-Ang-2                | Boster, Rabbit          | 1.5 $\mu$ g/ml       |
| Anti-VEGF                 | ProteinTech, Rabbit     | 1.5 $\mu$ g/ml       |
| Anti-FGF-2                | ProteinTech, Rabbit     | 1.5 $\mu$ g/ml       |
